# Supplementary material
Source: Springer Nature journal article supplement (https://www.springermedizin.de/resource/supplementary/13058_2011_3003_MOESM4_ESM.pdf/9703012)

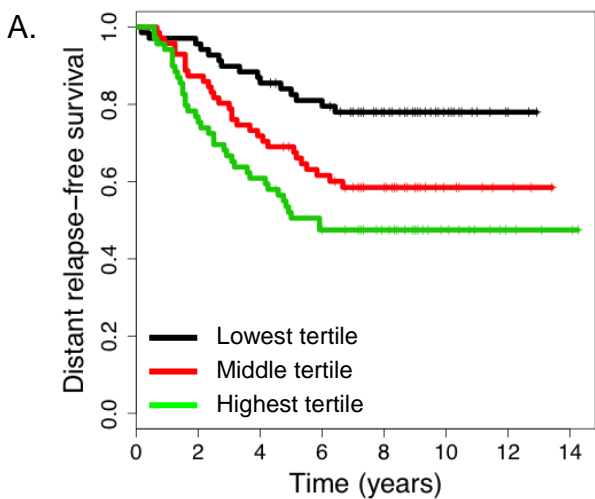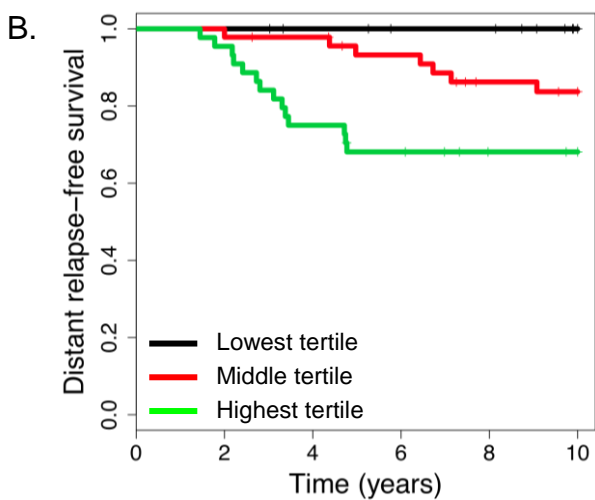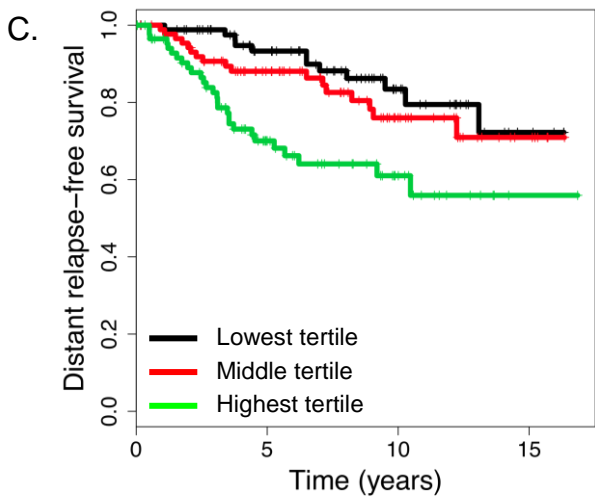

Supplement: MOESM4 [file 9703012]
